# Supplementary material for: Distribution and Activity of Sulfur-Metabolizing Bacteria along the Temperature Gradient in Phototrophic Mats of the Chilean Hot Spring Porcelana
Source: MDPI journal article supplement (doi:10.3390/microorganisms11071803), 2023-07-14
Supplement: s1 [file s1]

# Distribution and activity of sulfur-metabolizing bacteria along the temperature gradient of Porcelana phototrophic hot spring mats

Ricardo Konrad<sup>1</sup>, Pablo Vergara-Barros<sup>1</sup>, Jaime Alcorta<sup>1</sup>, María E. Alcamán-Arias<sup>2,3,4</sup>, Gloria Levicán<sup>5</sup>, Beatriz Díez<sup>1,3,6\*</sup>

<sup>1</sup>*Department of Molecular Genetics and Microbiology, Biological Sciences Faculty, Pontifical Catholic University of Chile, Santiago, Chile.*

<sup>2</sup>*Department of Oceanography, University of Concepcion, Concepcion, Chile.*

<sup>3</sup>*Center for Climate and Resilience Research (CR)2, Chile*

<sup>4</sup>*Escuela de Medicina, Universidad Espíritu Santo, Guayaquil 0901952, Ecuador*

<sup>5</sup>*Biology Department, Chemistry and Biology Faculty, University of Santiago of Chile, Santiago, Chile*

<sup>6</sup>*Center for Genome Regulation (CGR), Chile*

Corresponding author email/address:

[bdiez@bio.puc.cl](mailto:bdiez@bio.puc.cl)

*Department of Molecular Genetics and Microbiology, Pontifical Catholic University of Chile, Avenida Libertador Bernardo O'Higgins 340, Casilla 144-D, C.P. 651 3677, Santiago, Chile.*

**Keywords:** sulfur oxidation-reduction, soxB, aprA, 16S rRNA, phototrophic hot spring mat, metagenomics

Supplementary Table Legends

Table S1: PCR primer sequences for aprA and soxB and PCR parameters., Table S2: porcelana hot spring physicochemical parameters.

Table S3: gene names and KO IDs of sulfur cycle-associated pathways.

Table S4: gene counts for sul-fur-associated KO IDs grouped at order level in metagenomes and metatranscriptomes obtained from Porcelana hot spring.

Table S5: aprA and soxB CDS recovered from metagenomes and OTUs from Porcelana hot spring.

Table S6: Genomic taxonomy of aprA- or soxB-containing MAGs obtained from Porcelana hot spring according GTDB r89.

a) *aprA*

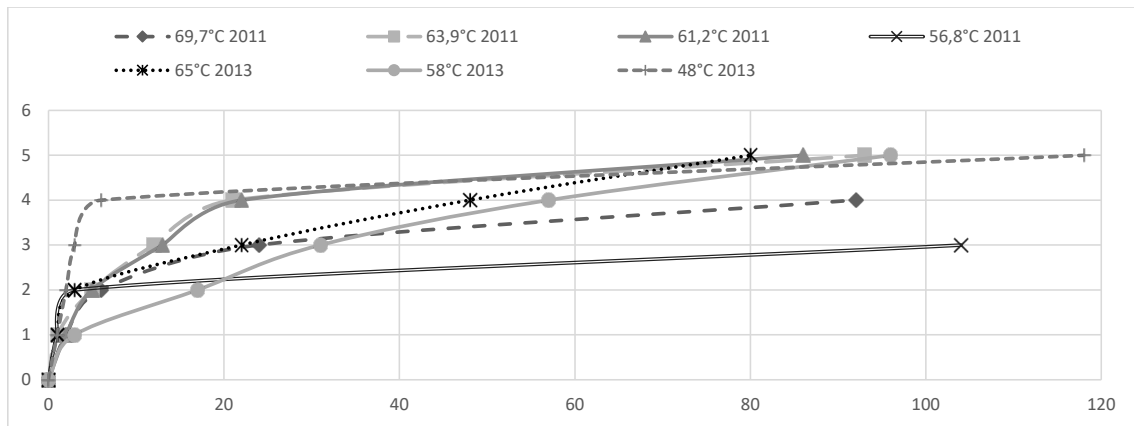

b) *soxB*

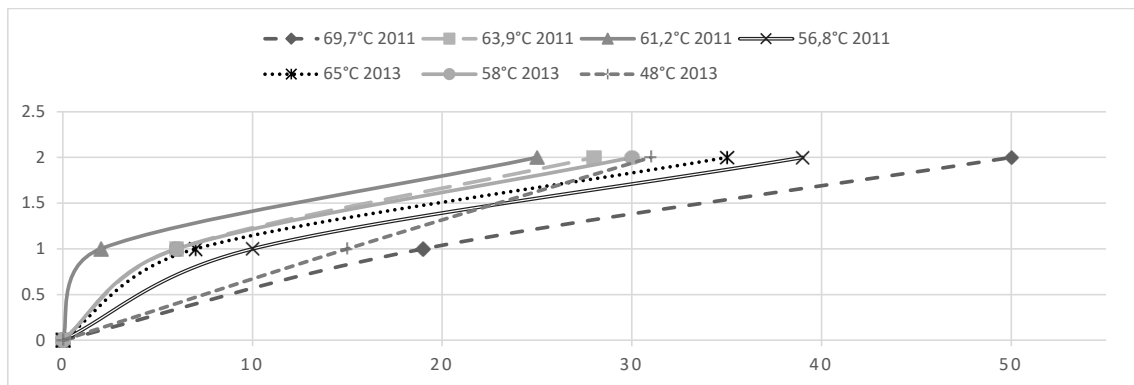

Figure S1. Rarefaction curves for *aprA* (a) and *soxB* (b) genes.
